# Supplementary material for: Fatigue in Multiple Sclerosis Is Associated with Reduced Expression of Interleukin-10 and Worse Prospective Disease Activity
Source: MDPI journal article supplement (doi:10.3390/biomedicines10092058), 2022-08-23
Supplement: s1 [file s1]

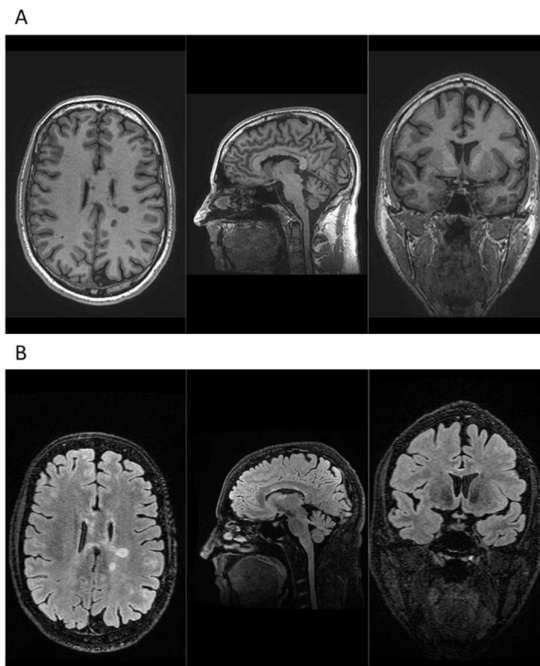

**Supplementary Figure S1:**

Figure Legends

**A:** high-resolution 3D T1 MRI image sample used to estimate cortical thickness.

**B:** high-resolution 3D T2 FLAIR CUBE MRI image used to estimate lesion burden.
